# Supplementary material for: Comparative Genomic Analysis of the Regulation of Aromatic Metabolism in Betaproteobacteria
Source: Front Microbiol. 2019 Mar 29;10:642. doi: 10.3389/fmicb.2019.00642 (PMC6449761; doi:10.3389/fmicb.2019.00642)
Supplement: Supplementary file 3 [file Table_2.xlsx]

## Sheet: aph bph
Table S2. Composition of the AphS/BphS, AphR, AphT, and BenR regulons in Betaproteobacteria
		aphS/bphS, COG1802 (GntR)	aphR, COG2204 (AtoC)/COG3604 (FhlA)/COG3829(RocR)	other AphR-TbuT homologues, COG2204 (AtoC)/COG3604 (FhlA)/COG3829(RocR)			aphT, COG583 (LysR)	aphKLMN		aphO, PF04663		aphP, COG2871 (NqrF)		aphQ, COG633 (Fdx)		aphB, COG2514			aphC, COG1012 (PutA)			aphI, COG1942	aphH, COG3971		bphD, COG596 (MhpC)		aphE/bphE(H), COG3971		aphG/bphF(I), COG119 (LeuA)		aphF/bphG(J), COG4569 (MhpF)		bphA1A2A3A4	bphB, COG1028 (FabG)	bphC, PF00903	bphX, PF06139	bphK, COG625 (Gst)	tmoA, PF02332	tmoB, PF06234	tmoC, COG2146 (NirD)	tmoD, PF02406	tmoE, PF02332	tmoF, COG2871 (NqrF)	tbuX, COG2067 (FadL)	COG3193 (GlcG)		COG3181	COG4313	COG3224
Bordetella avium 197N	BAV	0	0	0			0	0		0		0		0		0			0			0	0		0		0		0		0		0	0	0	0	0	0	0	0	0	0	0	0	0		0	0	0
Bordetella bronchiseptica RB50	BBR	0	0	0			0	0		0		0		0		0			0			0	0		0		0		0		0		0	0	0	0	0	0	0	0	0	0	0	0	0		0	0	0
Bordetella petrii DSM 12804	BPT	0	0	0			0	0		0		0		0		0			0			0	0		Y		0		0		0		Y	Y	0	0	0	0	0	0	0	0	0	0	0		0	0	0
Burkholderia cepacia AMMD	BAM	0	0	0			0	0		0		0		0		0			0			0	0		0		0		0		0		0	0	0	0	0	0	0	0	0	0	0	0	0		0	0	0
Burkholderia glumae BGR1	BGL	0	0	0			0	0		0		0		0		0			0			0	0		0		0		0		0		0	0	0	0	0	0	0	0	0	0	0	0	0		0	0	0
Burkholderia mallei ATCC 23344	BMA	0	0	0			0	0		0		0		0		0			0			0	0		0		0		0		0		0	0	0	0	0	0	0	0	0	0	0	0	0		0	0	0
Burkholderia phymatum STM815	BPH	0	0	0			0	0		0		0		0		0			0			0	0		0		0		0		0		0	0	0	0	0	0	0	0	0	0	0	0	0		0	0	0
Burkholderia pseudomallei K96243	BPS	0	0	0			0	0		0		0		0		0			0			0	0		0		0		0		0		0	0	0	0	0	0	0	0	0	0	0	0	0		0	0	0
Burkholderia sp. 383	BUR	Y	Y	0			0	Y		Y		Y		Y	Y	Y		Y	Y			Y	Y		Y	Y	Y		Y		Y		0	0	0	0	0	0	0	0	0	0	0	0	Y		0	Y	0
Burkholderia vietnamiensis G4	BVI	0	0	Y			0	Y		Y		Y		Y		Y			Y			Y	Y		Y		Y		Y		Y		0	0	0	0	0	Y	0	0	0	0	0	0	Y		0	0	0
Burkholderia xenovorans LB400	BXE	Y	0	0			0	0		0		0		0		0			0			0	0		Y		Y		Y		Y		Y	Y	Y	Y	Y	0	0	0	0	0	0	Y	0		0	0	0
Cupriavidus taiwanensis	CTI	0	0	0			0	0		0		0		0		0			0			0	0		Y		Y		Y		Y		0	0	0	0	0	Y	Y	0	Y	Y	0	0	0		0	0	0
Ralstonia eutropha H16	REH	0	0	Y			0	Y		Y		Y		Y		Y			Y			Y	Y		Y		Y	Y	Y	Y	Y	Y	0	0	0	0	0	0	0	0	0	0	0	0	0		0	0	0
Ralstonia eutropha JMP134	REU	Y	Y	Y			0	Y	Y	Y	Y	Y	Y	Y		Y			Y			Y	Y		Y		Y		0		0		0	0	0	0	0	Y	Y	Y	Y	Y	Y	Y	Y		0	0	0
Ralstonia metallidurans CH34	RME	0	0	Y		Y	0	Y	Y	Y	Y	Y	Y	Y		Y			Y			Y	Y		Y		Y		Y		Y		0	0	0	0	0	Y	Y	Y	Y	Y	Y	Y	Y		0	0	0
Ralstonia pickettii 12J	RPI	Y	Y	0			0	Y		Y		Y		Y		Y			Y			Y	Y		Y		Y		Y		Y		0	0	0	0	0	Y	Y	Y	Y	Y	Y	Y	Y		0	0	0
Ralstonia solanacearum GMI1000	RSO	0	0	Y			0	0		0		0		0		0			0			0	0		0		0		0		0		0	0	0	0	0	0	0	0	0	0	0	0	0		0	0	0
Acidovorax avenae subsp. citrulli AAC00-1	AAV	0	0	0			0	0		0		0		0		0			0			0	0		0		0		0		0		0	0	0	0	0	0	0	0	0	0	0	0	0		0	0	0
Acidovorax sp. JS42	AJS	Y	Y	0			Y*2	Y		Y		Y		Y*2		Y*2			Y			Y	Y		Y		Y		Y		Y		0	0	0	0	0	0	0	0	0	0	0	0	Y		Y	0	0
Comamonas testosteroni KF-1	CTS	0	0	0			0	0		0		0		0		0			0			0	0		0		Y		Y		Y		0	0	0	0	0	0	0	0	0	0	0	0	0		0	0	0
Delftia acidovorans SPH-1	DAC	0	0	0			Y	0		0		0		0		0			0			0	0		0		0		0		0		0	0	0	0	0	0	0	0	0	0	0	0	0		0	0	0
Leptothrix cholodnii SP-6	LCH	Y	Y	0			Y	Y		Y		Y		Y		Y			Y			Y	Y		Y		Y		Y		Y		0	0	0	0	0	0	0	0	0	0	0	0	Y		0	0	0
Methylibium petroleiphilum PM1	MPT	0	0	Y	Y	Y*2	Y*2	Y*2		Y*2		Y		Y	Y	Y*2			Y		Y	Y	Y	Y	Y		Y	Y	Y		Y		0	0	0	0	0	Y*2	Y*2	Y*2	Y*2	Y*2	Y	Y	Y		0	0	0
Polaromonas naphthalenivorans CJ2	PNA	Y	0	0			0	0		0		0		0		0			0			0	0		Y		Y		Y		Y		Y	Y	Y	Y	Y	0	0	0	0	0	0	0	0		0	0	0
Polaromonas sp. JS666	POL	0	0	Y			0	0		0		0		0		0			0			0	0		0		0		0		0		0	0	0	0	0	0	0	0	0	0	0	0	0		0	0	0
Rhodoferax ferrireducens DSM 15236	RFE	0	0	0			0	0		0		0		0		0			0			0	0		0		0		Y		Y		0	0	0	0	0	0	0	0	0	0	0	0	0		0	0	0
Variovorax paradoxus S110	VPA	0	0	0			0	0		0		0		0		0			0			0	0		0		0		0		0		0	0	0	0	0	0	0	0	0	0	0	0	0		0	0	0
Verminephrobacter eiseniae EF01-2	VEI	Y	Y	0			0	Y		Y		Y		Y		Y			Y			Y	Y		Y		Y		Y		Y		0	0	0	0	0	0	0	0	0	0	0	0	Y		Y	0	0
Azoarcus sp. BH72	AZO	Y*2	Y	Y			Y	Y	Y	Y	Y	Y	Y	Y	Y	Y	Y*2		Y	Y		Y	Y	Y	Y		Y	Y	Y	Y	Y	Y	0	0	Y	0	0	0	0	0	0	0	0	0	Y		0	0	Y
Azoarcus sp. EbN1	EBN	0	0	Y*3			0	0		0		0		0		0			0			0	0		0		0		0		0		0	0	0	0	0	0	0	0	0	0	0	0	0		0	0	0
Dechloromonas aromatica RCB	DAR	Y	Y	0			Y	Y		Y		Y		Y		Y	Y	Y	Y	Y	Y	Y	Y	Y	Y	Y	Y	Y	Y	Y*2	Y	Y*2	0	0	Y	0	0	Y	Y	Y	Y	Y	Y	Y	Y	Y	0	0	0
Thauera sp. MZ1T	TMZ	Y*2	Y	0			0	Y		Y		Y		Y		Y	Y		Y			Y	Y		Y		Y	Y	Y	Y	Y	Y	0	0	0	0	0	0	0	0	0	0	0	0	Y		0	0	Y
Y denotes the presence of the gene, 0 - the absence; number of paralogs is given; brown font denotes more distant homologs
Cell color denotes regulation by the corresponding TF, striped cells - dual regulation: AphS/BphS - red, AphR - orange, AphT - green, BenR - pink
[truncated: 37 more columns]

## Sheet: box ben
Composition of the BoxR/BzdR and BenR regulons in Betaproteobacteria
		boxR/bzdR, COG703 (AroK)	bzdNOPQMSTUVWXYZ	boxA, COG1143 (NuoI)/COG1146	boxB, COG3396	boxC, COG1024 (CaiD)	boxD, COG1012 (PutA)	bclA/bzdA, COG365 (Acs)/COG318 (CaiC)		benzoate ABC transporter, COG410 (LivF), COG411 (LivG), COG4177 (LivM), COG559 (LivH), COG683 (LivK)		COG2267 (PldB)/COG596 (MhpC)	COG1024 (CaiD)		COG1250 (FadB)		COG2030 (MaoC)	COG183 (PaaJ)				pfam16155	COG824	fdhBA	COG251	benR	benABCD	benK				benE	COG3945		COG4231
Bordetella avium 197N	BAV	0	0	0	0	0	0	0		0		0	0		0		0	0		0		0	0	0	0	0	0	0		0	0	0	0		0
Bordetella bronchiseptica RB50	BBR	0	0	0	0	0	0	0		0		Y	0		0		Y	0		0		0	0	0	0	0	0	0		0	0	0	0		0
Bordetella petrii DSM 12804	BPT	Y	0	Y	Y	Y	Y	Y		Y		Y	0		0		Y	0		0		Y	0	0	0	0	Y	Y		Y	0	Y	0		0
Burkholderia cepacia AMMD	BAM	0	0	0	0	0	0	0		0		0	0		0		0	0		0		0	0	0	0	0	Y	Y		0	0	Y	0		0
Burkholderia glumae BGR1	BGL	0	0	0	0	0	0	0		0		0	0		0		0	0		0		0	0	0	0	0	0	0		0	0	0	0		0
Burkholderia mallei ATCC 23344	BMA	0	0	0	0	0	0	0		0		0	0		0		0	0		0		0	0	0	0	0	Y	0		0	0	0	0		0
Burkholderia phymatum STM815	BPH	Y	0	Y	Y	Y	0	Y		0		Y	0		0		0	0		0		Y	0	0	0	0	Y	0		0	0	0	Y		0
Burkholderia pseudomallei K96243	BPS	0	0	0	0	0	0	0		0		0	0		0		0	0		0		0	0	0	0	0	Y	0		0	0	0	0		0
Burkholderia sp. 383	BUR	0	0	0	0	0	0	0		0		0	0		0		0	0		0		0	0	0	0	0	Y	Y		0	0	Y	0		0
Burkholderia vietnamiensis G4	BVI	0	0	0	0	0	0	0		0		0	0		0		0	0		0		0	0	0	0	0	Y	0		0	0	Y	Y		0
Burkholderia xenovorans LB400	BXE	Y*2	0	Y*2	Y*2	Y*2	Y*2	Y*2		0		Y*2	Y		Y		0	0		0		Y*2	0	0	0	0	Y	Y		0	0	0	0		0
Cupriavidus taiwanensis	CTI	Y*2	0	Y*2	Y*2	Y*2	Y	Y*2		Y		Y	0		0		0	0		0		Y	0	0	0	0	0	Y		0	0	0	0		0
Ralstonia eutropha H16	REH	Y*2	0	Y*2	Y*2	Y*2	Y	Y*2		Y		Y	0		0		0	0		0		Y	0	0	0	0	Y	Y	Y	0	0	0	0		0
Ralstonia eutropha JMP134	REU	Y	0	Y	Y	Y	0	Y		Y		Y	0		0		0	0		0		0	0	0	0	0	Y	Y	Y*3	0	0	Y	0		0
Ralstonia metallidurans CH34	RME	Y	0	Y	Y	Y	0	Y		Y		Y	0		0		0	0		0		0	0	0	0	0	Y	0		0	0	0	0		0
Ralstonia pickettii 12J	RPI	0	0	0	0	0	0	0		0		0	0		0		0	0		0		0	0	0	0	0	Y	Y	Y	0	0	Y	0		0
Ralstonia solanacearum GMI1000	RSO	0	0	0	0	0	0	0		0		0	0		0		0	0		0		0	0	0	0	0	0	0		0	0	0	0		0
Acidovorax avenae subsp. citrulli AAC00-1	AAV	0	0	0	0	0	0	0		0		0	0		0		0	0		Y		0	0	0	0	0	0	0		0	0	0	0		0
Acidovorax sp. JS42	AJS	0	0	0	0	0	0	0		0		0	0		0		0	0		Y		0	0	0	0	0	0	0		0	0	0	0		0
Comamonas testosteroni KF-1	CTS	Y	0	Y	Y	Y	Y	Y		Y		0	0		0		0	0		Y		0	0	0	0	0	0	0		0	0	0	0		0
Delftia acidovorans SPH-1	DAC	Y	0	Y	Y	Y	0	Y		Y		0	0		0		0	0		Y		0	0	0	0	0	0	0		0	0	0	0		0
Leptothrix cholodnii SP-6	LCH	Y	0	Y	Y	Y	Y	Y		Y		Y	Y	Y	Y	Y	Y	0		Y	Y*3	Y	0	0	0	0	0	0		0	0	0	Y*2		0
Methylibium petroleiphilum PM1	MPT	0	0	0	0	0	0	0		0		Y	Y		Y		0	0		Y		0	0	0	0	0	0	0		0	0	0	Y		0
Polaromonas naphthalenivorans CJ2	PNA	Y	0	Y	Y	Y	Y	Y		Y	Y*2	Y	Y		Y		0	0		Y*2		Y	0	0	0	0	Y	Y		0	0	Y	Y*2		0
Polaromonas sp. JS666	POL	Y	0	Y	Y	Y	Y	Y	Y	Y	Y	Y	Y		Y		0	0		Y		Y	0	0	0	0	0	0		0	0	0	Y		0
Rhodoferax ferrireducens DSM 15236	RFE	Y	0	Y	Y*2	Y	Y	Y		Y		Y	Y		Y		Y	0		Y	Y	Y	0	0	0	0	0	0		0	0	0	Y	Y	0
Variovorax paradoxus S110	VPA	Y	0	Y	Y	Y	Y	Y		Y		Y	0		0		Y	0		Y		Y	0	0	0	0	0	Y		0	0	0	Y		0
Verminephrobacter eiseniae EF01-2	VEI	Y	0	Y	Y	Y	0	Y		Y		0	0		0		0	0		Y		0	0	0	0	0	0	0		0	0	0	0		0
Azoarcus sp. BH72	AZO	Y	0	Y	Y	Y	Y	Y		Y		Y	0		0		0	Y	Y	0		Y	Y	Y	0	0	0	0		0	0	0	Y*2		0
Azoarcus sp. EbN1	EBN	Y*2	Y	Y	Y	Y	Y	Y*2		Y		Y	0		0		0	Y	Y	0		Y	Y	Y	Y	0	0	0		Y	0	0	Y		0
Dechloromonas aromatica RCB	DAR	0	0	0	0	0	0	0		Y		Y	0		0		0	0		0		0	0	0	0	Y	Y	0		0	0	0	Y	Y*2	Y
Thauera sp. MZ1T	TMZ	Y	0	0	Y	Y	0	Y		Y	Y	0	0		0		0	0		0		0	0	0	Y	Y	Y	Y		Y	Y	0	Y	Y	Y
Y denotes the presence of the gene, 0 - the absence; number of paralogs is given; brown font denotes more distant homologs
Cell color denotes regulation by the corresponding TF, striped cells - dual regulation: BoxR/BzdR - brown, BenR - pink, AphS/BphS - red, CatM/BenM - light blue

## Sheet: mml clc tfd cat
Composition of the CatR, CatM/BenM, ClcR, TfdR(S), CatR*, and MmlR regulons in Betaproteobacteria
		mmlR, COG583 (LysR)	mmlL, COG491 (GloB)	mmlF, COG1788 (AtoD), catI-like	mmlG, COG2057 (AtoA), catJ-like	mmlH, COG2271 (UhpC)	mmlI, PF09448	mmlJ, COG4829 (CatC1)	clcR/tfdR(S/T), COG583 (LysR)	clcA/tfdCI/II, COG3485 (PcaH)	clcB/tfdDI, COG4948	tfdDII, COG4948	clcD/tfdEI, COG412	tfdEII, COG412	clcE/tfdFI, COG1454 (EutG)	tfdFII, COG1454 (EutG)	tfdBI, COG654 (UbiH)	tfdBII, COG654 (UbiH)	tfdK, COG2271 (UhpC)	tfdA, COG2175 (TauD)	COG1024 (CaiD)	COG1414 (IclR)	COG318 (CaiC)	COG183 (PaaJ)	COG1545	COG3181 (clcC)	COG2207 (AraC)	catR*, COG583 (LysR)	catA homolog, COG3485 (PcaH)	catB homolog, COG4948	catC homolog, COG4829 (CatC1)	catR, COG583 (LysR)	catM/benM, COG583 (LysR)	catA, COG3485 (PcaH)		catB, COG4948			catC, COG4829 (CatC1)		COG251 (TdcF)	catI (fragment), COG1788 (AtoD)	catF (fragment), COG183 (PaaJ)	catD/pcaD, COG596 (MhpC)/COG2267 (PldB)	COG1012 (PutA), areC	COG1062 (AdhC), areB	COG2271 (UhpC)	COG1159 (Era)	PF00350
Bordetella avium 197N	BAV	0	0	0	0	0	0	0	0	0	0	0	0	0	0	0	0	0	0	0	0	0	0	0	0	0	0	0	0	0	0	0	0	0		0			Y		0	0	0	0	0	0	0	0	0
Bordetella bronchiseptica RB50	BBR	0	0	0	0	0	0	0	0	0	0	0	0	0	0	0	0	0	0	0	0	0	0	0	0	0	0	0	0	0	0	0	0	0		0			Y		0	0	0	0	0	0	0	0	0
Bordetella petrii DSM 12804	BPT	0	0	0	0	0	0	0	Y*2	Y*2	Y*2	0	Y*2	0	Y*2	0	0	0	0	0	0	0	0	0	0	Y*2	Y	0	0	0	0	Y	Y	0	Y	Y	Y		Y	Y	Y	Y	Y	Y	Y	Y	Y	Y	Y
Burkholderia cepacia AMMD	BAM	0	0	0	0	0	0	0	0	0	0	0	0	0	0	0	0	0	0	0	0	0	0	0	0	0	0	0	0	0	0	Y	Y	Y	Y	Y	Y		Y	Y	Y	0	0	0	Y	Y	0	0	0
Burkholderia glumae BGR1	BGL	0	0	0	0	0	0	0	0	0	0	0	0	0	0	0	0	0	0	0	0	0	0	0	0	0	0	0	0	0	0	Y	0	Y		Y			Y		0	0	0	0	0	0	0	Y	Y
Burkholderia mallei ATCC 23344	BMA	0	0	0	0	0	0	0	0	0	0	0	0	0	0	0	0	0	0	0	0	0	0	0	0	0	0	0	0	0	0	Y	Y	Y		Y			Y		0	0	0	0	0	0	0	0	0
Burkholderia phymatum STM815	BPH	0	0	0	0	0	0	0	0	0	0	0	0	0	0	0	0	0	0	0	0	0	0	0	0	0	0	0	0	0	0	Y	Y	Y		Y			Y		0	0	0	0	0	0	0	0	0
Burkholderia pseudomallei K96243	BPS	0	0	0	0	0	0	0	0	0	0	0	0	0	0	0	0	0	0	0	0	0	0	0	0	0	0	0	0	0	0	Y	Y	Y		Y			Y		0	0	0	0	0	0	0	0	0
Burkholderia sp. 383	BUR	0	0	0	0	0	0	0	0	0	0	0	0	0	0	0	0	0	0	0	0	0	0	0	0	0	0	0	0	0	0	Y	Y	Y	Y	Y	Y		Y		Y	0	0	0	0	0	0	0	0
Burkholderia vietnamiensis G4	BVI	0	0	0	0	0	0	0	0	0	0	0	0	0	0	0	0	0	0	0	0	0	0	0	0	0	0	0	0	0	0	Y	Y	Y	Y	Y			Y		Y	0	0	0	0	0	0	0	0
Burkholderia xenovorans LB400	BXE	0	0	0	0	0	0	0	Y	Y	Y	0	Y	0	Y	0	0	0	0	0	0	0	0	0	0	Y	Y	0	0	0	0	Y	Y	Y		Y			Y		0	0	0	0	Y	0	0	0	0
Cupriavidus taiwanensis	CTI	0	0	0	0	0	0	0	0	0	0	0	0	0	0	0	0	0	0	0	0	0	0	0	0	0	0	0	0	0	0	0	0	0		0			0		0	0	0	0	0	0	0	0	0
Ralstonia eutropha H16	REH	Y	Y	Y	Y	Y	Y	Y	0	0	0	0	0	0	0	0	0	0	0	0	0	0	0	0	0	0	0	0	0	0	0	Y	Y	Y		Y	Y*2	Y	Y*2	Y	0	0	0	0	Y	0	0	0	0
Ralstonia eutropha JMP134	REU	Y	Y	Y	Y	Y	Y	Y	Y*3	Y*2	Y	Y	Y	Y	Y	Y	Y	Y	Y	Y	Y	Y	Y	Y	Y	0	0	0	0	0	0	Y	Y	Y	Y	Y	Y		Y		0	0	0	0	0	0	0	0	0
Ralstonia metallidurans CH34	RME	0	0	0	0	0	0	0	0	0	0	0	0	0	0	0	0	0	0	0	0	0	0	0	0	0	0	0	0	0	0	Y	Y	Y	Y	Y			Y		0	0	0	0	0	0	0	0	0
Ralstonia pickettii 12J	RPI	0	0	0	0	0	0	0	0	0	0	0	0	0	0	0	0	0	0	0	0	0	0	0	0	0	0	0	0	0	0	0	Y	Y		Y			Y		0	0	0	0	0	0	0	0	0
Ralstonia solanacearum GMI1000	RSO	0	0	0	0	0	0	0	0	0	0	0	0	0	0	0	0	0	0	0	0	0	0	0	0	0	0	0	0	0	0	0	0	0		0			0		0	0	0	0	0	0	0	0	0
Acidovorax avenae subsp. citrulli AAC00-1	AAV	0	0	0	0	0	0	0	0	0	0	0	0	0	0	0	0	0	0	0	0	0	0	0	0	0	0	Y	0	Y	0	0	0	0		0			0		0	Y	Y	Y	0	0	0	0	0
Acidovorax sp. JS42	AJS	0	0	0	0	0	0	0	0	0	0	0	0	0	0	0	0	0	0	0	0	0	0	0	0	0	0	Y	Y	Y	Y	0	0	0		0			0		0	Y	Y	Y	0	0	0	0	0
Comamonas testosteroni KF-1	CTS	0	0	0	0	0	0	0	0	0	0	0	0	0	0	0	0	0	0	0	0	0	0	0	0	0	0	Y	0	Y	0	0	0	0		0			0		0	Y	Y	Y	0	0	0	0	0
Delftia acidovorans SPH-1	DAC	0	0	0	0	0	0	0	0	0	0	0	0	0	0	0	0	0	0	0	0	0	0	0	0	0	0	Y	Y	Y	Y	0	0	0		0			0		0	Y	Y	0	0	0	0	0	0
Leptothrix cholodnii SP-6	LCH	0	0	0	0	0	0	0	0	0	0	0	0	0	0	0	0	0	0	0	0	0	0	0	0	0	0	0	0	0	0	0	0	0		0			0		0	Y	Y	0	0	0	0	0	0
Methylibium petroleiphilum PM1	MPT	0	0	0	0	0	0	0	0	0	0	0	0	0	0	0	0	0	0	0	0	0	0	0	0	0	0	0	0	0	0	0	0	0		0			0		0	0	0	0	0	0	0	0	0
Polaromonas naphthalenivorans CJ2	PNA	0	0	0	0	0	0	0	0	0	0	0	0	0	0	0	0	0	0	0	0	0	0	0	0	0	0	Y	Y	Y	Y	0	Y	0		0			0		0	Y	Y	0	0	0	0	0	0
Polaromonas sp. JS666	POL	0	0	0	0	0	0	0	0	0	0	0	0	0	0	0	0	0	0	0	0	0	0	0	0	0	0	0	0	0	0	0	0	0		0			0		0	Y	Y	0	0	0	0	0	0
Rhodoferax ferrireducens DSM 15236	RFE	0	0	0	0	0	0	0	0	0	0	0	0	0	0	0	0	0	0	0	0	0	0	0	0	0	0	0	0	0	0	0	0	0		0			0		0	Y	Y	0	0	0	0	0	0
Variovorax paradoxus S110	VPA	0	0	0	0	0	0	0	0	0	0	0	0	0	0	0	0	0	0	0	0	0	0	0	0	0	0	0	0	0	0	0	0	0		0			0		0	Y	Y	0	0	0	0	0	0
Verminephrobacter eiseniae EF01-2	VEI	0	0	0	0	0	0	0	0	0	0	0	0	0	0	0	0	0	0	0	0	0	0	0	0	0	0	0	0	0	0	0	0	0		0			0		0	0	0	0	0	0	0	0	0
Azoarcus sp. BH72	AZO	0	0	0	0	0	0	0	0	0	0	0	0	0	0	0	0	0	0	0	0	0	0	0	0	0	0	0	0	0	0	0	0	0		0			0		0	0	0	0	0	0	0	0	0
Azoarcus sp. EbN1	EBN	0	0	0	0	0	0	0	0	0	0	0	0	0	0	0	0	0	0	0	0	0	0	0	0	0	0	0	0	0	0	0	0	0		0			0		0	0	0	0	0	0	0	0	0
Dechloromonas aromatica RCB	DAR	0	0	0	0	0	0	0	0	0	0	0	0	0	0	0	0	0	0	0	0	0	0	0	0	0	0	0	0	0	0	0	0	0		0			0		0	0	0	0	0	0	0	0	0
Thauera sp. MZ1T	TMZ	0	0	0	0	0	0	0	0	0	0	0	0	0	0	0	0	0	0	0	0	0	0	0	0	0	0	0	0	0	0	0	0	0		0			0		0	0	0	0	0	0	0	0	0
Y denotes the presence of the gene, 0 - the absence; number of paralogs is given; brown font denotes more distant homologs
Cell color denotes regulation by the corresponding TF: MmlR - dark violet, ClcR/TfdR(S) - violet, CatR - blue, CatM/BenM - light blue, CatR* - dark blue, AphR - orange
[truncated: 7 more columns]
