# Supplementary material for: Comparative Genomic Analysis of the Regulation of Aromatic Metabolism in Betaproteobacteria
Source: Front Microbiol. 2019 Mar 29;10:642. doi: 10.3389/fmicb.2019.00642 (PMC6449761; doi:10.3389/fmicb.2019.00642)
Supplement: Supplementary file 4 [file Table_3.xlsx]

## Sheet: aphSbphS aphR aphT
Table S3. Binding sites of the phenol/biphenyl regulators in Betaproteobacteria
AphS/BphS binding sites					AphR, AphR/TbuT homologues binding sites					AphT binding sites
Ajs_0205	-223	4.80	AAATaTCGAtAaaT		Ajs_0205	-101	3.99	aTGATgttTTGATgAg		Ajs_0212	-38	4.67	tATACtggTgAGGTATt
	-13	4.02	gttTaTCGAtAcTT			-68	5.17	TTGATgAAaTGgTgAA		Ajs_0213	-105	4.78	aATACCTcacCaGTATa
Ajs_0206	-294	4.00	AAgTaTCGAtAaac		Ajs_0206	-241	5.17	TTcAcCAtTTcATCAA		Ajs_0216	-159	4.54	aATACCaTTtCcGcATC
	-84	4.84	AttTaTCGAtATTT			-208	3.99	cTcATCAAaacATCAt			-40	4.93	GATACCaTTtCtGcATC
azo1968	-73	5.39	AAATCTCGAGATTT		azo2444	-189	5.64	TTGATCAtTTGATCAA		Ajs_0217	-247	4.13	GATgCagaaAtGGTATC
azo1969	-113	5.39	AAATCTCGAGATTT			-181	4.41	TTGATCAAcTGATaAg		Daci_3126	-35	5.48	cATACCaTTcAGGTATC
azo2436	-92	5.39	AAATCTCGAGATTT			-160	4.87	TTGATCAAaTGATtcA		Daci_3127	-10	5.51	GATACCTgaAtGGTATg
azo2437	-79	5.39	AAATCTCGAGATTT		Tmz1t_3116	-188	4.37	TaaATCAAaTaATCAA		Lcho_3344	-127	5.87	GATACCTTTAtGGTATC
azo2438	-117	5.32	AAATaTCGAGATTT			-159	5.31	TTGATCAtTTGgTgAA		Lcho_3345	-61	5.82	GATACCaTaAAGGTATC
azo2444	-117	4.81	AAATaTCGAGAaaa		Tmz1t_3117	-342	5.31	TTcAcCAAaTGATCAA		Mpe_A2278	-177	4.97	aATACtggattGGTATC
azo2445	-127	5.12	tAATCTCGAGATTa			-313	4.43	TTGATtAtTTGATttA		Mpe_A2279	-42	5.16	GATACCaaTcCaGTATt
azo2446	-186	5.12	tAATCTCGAGATTa		Daro_3797	-178	5.35	TTGATCAtTTGATtAA		Mpe_A3311	-163	5.57	GATACCTacAAGGTATC
Tmz1t_3083	-86	4.91	AttTCTCGAtATTT		Daro_3798	-275	5.30	TTaATCAAaTGATCAA		Mpe_A3328	-92	5.16	aATACCggTgCGGTATg
Tmz1t_3100	-164	4.33	tAAaaTCGAGATTc		Lcho_3363	-214	4.04	TgaATgAtTTGATCAt		Daro_3804	-133	4.83	cATACCTTTtCcGTATC
Tmz1t_3102	-89	5.23	AAATCTCGAGAaTT			-206	4.83	TTGATCAtTTcAgCAg		Daro_3779	-193	4.70	GATACCcggcAGGTATC
Tmz1t_3107	-89	4.88	AAATCTCGAGAaaa			-174	4.64	cTGATgAAaTcATCAt		azo1835	-54	5.26	aATACCTTcgCGGTATg
Tmz1t_3108	-85	4.91	tttTCTCGAGATTT		Lcho_3364	-41	4.64	aTGATgAtTTcATCAg		azo1836	-332	4.38	cATACCgcgAAGGTATt
Tmz1t_3116	-347	4.88	AAATCTCGAGAaaa			-9	4.83	cTGcTgAAaTGATCAA		azo1852	-145	4.86	GATACCcTgAAGGTATC
	-118	4.16	gAATaTCGAGAaag			-1	4.27	aTGATCAAaTcATtcA
Tmz1t_3117	-381	4.13	cttTCTCGAtATTc		Veis_2796	-199	5.38	TTcATCAtTTcATCAA
	-152	4.91	tttTCTCGAGATTT			-168	4.73	TTGATgAtTTagTgAA
Daro_2777	-191	4.02	AAATaTCcAGtTTT		Veis_2797	-143	4.73	TTcActAAaTcATCAA
Daro_2778	-75	3.95	AAAaCTgGAtATTT			-112	5.38	TTGATgAAaTGATgAA
Daro_2782	-155	4.47	tAAaCTCGAGATTa		Bcep18194_B2971	-216	5.50	TTGATCAtTTcATCAA
	-137	4.66	ttATaTCGAtAaTT			-185	5.11	TTGcTCAAaTGATgAA
Daro_3779	-113	5.32	AAATaTCGAGATTT		Bcep18194_B2972	-117	5.11	TTcATCAtTTGAgCAA
Daro_3789	-108	4.88	AAATCTCGAGAaaa			-86	5.50	TTGATgAAaTGATCAA
Daro_3790	-88	4.91	tttTCTCGAGATTT		Bcep18194_B1181	-174	3.77	aTGATgAtgTaATCAg
Daro_3797	-329	4.78	tttTCTCGAGATTa			-80	4.27	cTGATgAcaTcATCAg
Daro_3798	-122	4.74	tAATCTCGAGAaaa		Bcep18194_C6776	-231	4.54	TTGgTCAATTGATCAt
Daro_3820	-102	4.69	AAtTaTCGAGAaaa		Bcep18194_C6784	-143	4.03	acGgTCAtTTGATCAA
Lcho_3363	-61	5.07	AAtTaTCGAGATTa		Bcep18194_C6785	-98	4.77	TTGgcCAAaTGATCAA
Lcho_3364	-152	4.95	tAATCTCGAtAaTT		Bcep18194_C6789	-254	4.35	gTGgTCAtTTGATCAA
Veis_2796	-261	4.93	gAtTCTCGAtATTT		Bcep18194_C6794	-234	4.32	TTGgTCAAaTGAcCAA
	-44	5.32	AAATaTCGAGATTT		Rpic_4631	-263	4.68	TcGAcgAtTTGATgAA
Veis_2797	-265	5.25	AAATCTCGAtATTT			-231	4.72	TgcATCAAaTcATCAA
	-48	4.96	AAATaTCGAGAaTc		Rpic_4632	-284	4.65	cTtAcCAATTGATgAA
Pnap_4153	-115	3.92	AAATgTCGAtAgTa			-276	3.96	TTGATgAAaTcAaCcg
	-96	3.50	cAATaTCGAcATcT			-239	3.52	cTGATCAAaaacTgAA
Bcep18194_B2971	-270	4.56	AttTCTCGtGATTT		Rpic_4639	-330	5.16	TTGATCAATTGgTtAA
	-61	5.20	AAtTaTCGAGATTT			-296	3.75	TgcAcCAgaTGgTgAA
Bcep18194_B2972	-239	5.09	AAATCTCGAtAaTT		Rpic_4640	-165	3.93	TTcAcCAtcTGgTgcA
	-30	4.52	AAATCaCGAGAaaT			-131	5.11	TTaAcCAATTGATCAA
Bxe_C1198	-109	4.18	gAATgTCGAtAaTa		Rmet_1787	-199	5.64	TTGATCAtTTGATCAA
	-97	3.79	tAATaTCaAcATTa			-168	5.12	cTcATCAAaTcATCAA
Reut_B5671	-244	5.25	AAATCTCGAtATTT		Rmet_1788	-175	5.12	TTGATgAtTTGATgAg
	-45	4.92	gAATaTCGAGATTc			-144	5.64	TTGATCAAaTGATCAA
Reut_B5672	-380	4.85	gAATCTCGAtATTc		Reut_A1698	-193	4.91	TTGAcgAtTTGATgAg
	-181	5.32	AAATaTCGAGATTT			-185	3.85	TTGATgAgaTGAaaAA
Reut_B5679	-298	5.07	AAtTCTCGAGATTc			-162	5.31	TTcAcCAAaTGATCAA
Reut_B5680	-331	5.03	gAATCTCGAGAaTT		Reut_A1699	-192	5.31	TTGATCAtTTGgTgAA
	-121	5.32	AAATaTCGAGATTT			-169	3.85	TTttTCAtcTcATCAA
Rpic_4631	-431	4.83	gAATCTCGAGAaTc			-161	4.91	cTcATCAAaTcgTCAA
	-118	5.32	AAATaTCGAGATTT		Reut_B5671	-146	4.79	TTGAcgAtaTGATCtA
Rpic_4632	-297	4.87	gAtTCTCGAGATTc			-111	5.04	TTcATCAAaTGATCgA
Rpic_4639	-408	4.85	gAATCTCGAtATTc		Reut_B5672	-316	5.03	TcGATCAtTTGATgAA
	-184	5.19	AAATaTCGAGATTa			-281	4.78	TaGATCAtaTcgTCAA
Rpic_4640	-275	5.11	tAATCTCGAtATTT		Reut_B5679	-385	4.73	TTGATgAtTTGATtgA
	-51	4.92	gAATaTCGAGATTc			-352	4.60	TTcATtAAaTGATCgA
						-285	4.86	cTtATCAATTGATgAA
					Reut_B5680	-346	4.86	TTcATCAATTGATaAg
						-279	4.59	TcGATCAtTTaATgAA
						-246	4.67	TcaATCAAaTcATCAA
					H16_B0539	-384	3.89	TTcccCAcTTGATCAt
						-376	5.04	TTGATCAtTTGATgcA
						-189	5.64	TTGATCAtTTGATCAA
						-159	4.92	TTcATCAATTcATCgA
					Mpe_A2285	-181	5.31	TTcAcCAAaTGATCAA
						-158	3.42	TgcAgCAAcTGATCAg
						-15	3.56	gTGATggATTGAaCAA
						-7	3.29	TTGAaCAAaTGAagct
					Mpe_A3309	-121	3.84	TgcATgAATTGATacA
					Mpe_A3310	-71	3.84	TgtATCAATTcATgcA

## Sheet: boxR benR
Binding sites of the benzoate regulators in Betaproteobacteria
BoxR/BzdR binding sites					BenR binding sites
Bpet3570	-108	4.37	cTGCACTtTtcTGCAT		Tmz1t_0646	-195	5.46	TGCAcgAAgCGGATA
	-68	3.95	gTGCAtTAatcTGCAc			-173	4.82	TGCAcAAgctGGATA
	-58	4.63	cTGCACTtTAaTtCAT		Tmz1t_3095	-156	5.55	TGCAcAAAgCGGATA
	-39	4.65	ATGCAgTATtaTtCAT			-134	5.30	TGCAcgAAgtGGATA
Bpet3571	-139	4.92	ATGCAaTAcAtTGCtT		Tmz1t_3096	-104	5.21	TGCAGAgAgtGGATA
	-87	4.49	caGaAaaATAGTGCtT			-82	5.31	TGCAagAActGGATA
	-56	5.63	AaGCACTATAGTGCAT		Daro_2777	-116	5.66	TGCAGAAActGGATA
Bpet3572	-142	5.70	ATGCACTATAGTGCtT		Daro_2778	-101	5.50	TGCAGAAttCGGATA
	-111	4.49	AaGCACTATttTtCtg			-79	5.40	TGCAaAAActGGATA
	-59	4.84	AaGCAaTgTAtTGCAT
Bphy_1540	-79	4.73	ATGaAgTAaAGTGCtT
	-48	4.43	ATGCAtTATtGTtCgc
Bphy_1541	-169	4.05	AcGCACctTAGTtCAT
	-41	4.93	AaGCACTATAGTaCAc
Bphy_1542	-228	4.98	gTGtACTATAGTGCtT
	-100	4.48	ATGaACTAagGTGCgT
Bxe_C0892	-83	4.73	ATGaAgTAaAGTGCtT
	-52	4.39	gTGCAtTATtGTtCAc
Bxe_C0893	-41	5.26	AaGCACTATAGTaCAT
Bxe_C0894	-159	5.33	ATGtACTATAGTGCtT
Bxe_A4554	-168	5.33	ATGtACTATAGTGCtT
	-50	4.30	ATGCAtTAacGTGCgT
Bxe_A1421	-159	4.20	AcGCACgtTAaTGCAT
	-41	5.26	AaGCACTATAGTaCAT
Bxe_A1422	-82	5.43	ATGCACTAaAGTGCtT
	-51	4.71	ATGCACTATtGTtCAa
RALTA_B1613	-65	4.86	cTGCACaATAaTGCtT
	-33	4.99	ATGaACTATAGTtCgT
	1	4.95	ATGCACgATAGTGCAg
RALTA_B1614	-43	5.33	ATGCAtTATtGTGCAT
	6	5.53	AaGCACTATAtTGCAT
RALTA_B1615	-111	5.59	ATGCAaTATAGTGCtT
	-62	5.33	ATGCACaATAaTGCAT
RALTA_A1323	-55	5.46	ATGCACTATAtTtCAT
	-28	5.11	AgGCACTATAGTGCAc
RALTA_A1324	-167	4.53	ATGCAtTtTAtTtCAc
	-127	4.56	ATGCACTATAGgaCAg
RALTA_A1325	-169	4.64	cTGtcCTATAGTGCAT
	-129	4.64	gTGaAaTAaAaTGCAT
H16_B1914	-102	5.05	cTGCACaATAGTGCtT
	-70	4.99	ATGaACTATAGTtCgT
	-36	4.95	ATGCACgATAGTGCAg
H16_B1915	-43	5.33	ATGCAtTATtGTGCAT
	6	5.53	AaGCACTATAtTGCAT
H16_B1916	-111	5.59	ATGCAaTATAGTGCtT
	-62	5.33	ATGCACaATAaTGCAT
H16_A1410	-55	5.46	ATGCACTATAtTtCAT
	-28	5.11	AgGCACTATAGTGCAc
H16_A1411	-154	4.86	ATGCAtTtTAtTtCAT
	-114	4.56	ATGCACTATAGgaCAg
H16_A1412	-170	4.64	cTGtcCTATAGTGCAT
	-130	4.99	ATGaAaTAaAaTGCAT
Reut_A1325	-55	5.46	ATGCACTATAtTtCAT
	-28	5.44	AgGCACTATAGTGCAT
Reut_A1326	-164	4.86	ATGCAtTtTAtTtCAT
	-124	4.51	ATGCACTATAtgaCAc
Reut_A1327	-170	4.53	gTGtcaTATAGTGCAT
	-130	4.99	ATGaAaTAaAaTGCAT
Rmet_1222	-85	3.93	tTGCACgATctTGCAT
	-58	5.46	ATGCACTATAtTtCAT
	-31	5.44	AgGCACTATAGTGCAT
Rmet_1223	-135	5.12	ATGCAtTtTAtTGCAT
	-95	3.93	ATGCACTATAtgaCcg
Rmet_1224	-169	4.15	cgGtcaTATAGTGCAT
	-129	5.25	ATGCAaTAaAaTGCAT
CtesDRAFT_3948	-108	4.61	ATGCAacATAGTGCcT
	-65	4.15	cTGCAtaATtGTGCcT
	-34	4.83	cTGCACTATttTtCAT
CtesDRAFT_3977	-118	5.49	ATGCAaTATAtTGCtT
	-67	4.87	AcGCACaATAtTGCAT
CtesDRAFT_3978	-116	5.12	ATGCAaTATtGTGCgT
	-65	5.42	AaGCAaTATAtTGCAT
Daci_0074	-103	4.23	AcGCACTATcGTGCgT
	-60	4.15	cTGCAtaATtGTGCcT
	-29	4.83	cTGCACTATttTtCAT
Daci_0075	-119	5.12	ATGCAaTATtGTGCgT
	-68	5.53	AaGCACTATAtTGCAT
Daci_0076	-122	5.59	ATGCAaTATAGTGCtT
	-71	4.87	AcGCACaATAtTGCAT
Lcho_3657	-119	5.60	ATGCACTATAtTGCtT
	-70	4.88	AaGCACaATAaTtCAT
Lcho_3658	-45	4.95	ATGaAtTATtGTGCtT
	4	5.52	AaGCAaTATAGTGCAT
Lcho_3659	-100	5.02	ATGCAaTAgAGTGCtT
	-70	4.71	ATGCAaTATgaTGCgT
Pnap_2944	-100	4.73	ATGCAtaAaAaTGCtT
	-68	4.83	ATGCAtTATtaTGCgT
	-35	4.07	ATGCAgTtTcaTGCAT
Pnap_2945	-43	5.28	ATGaACTATtGTGCAT
	6	5.42	AaGCAaTATAtTGCAT
Pnap_2946	-109	5.49	ATGCAaTATAtTGCtT
	-60	5.26	ATGCACaATAGTtCAT
Bpro_1626	-105	5.49	ATGCAaTATAtTGCtT
	-57	4.50	tTGCACaATAaTtCAT
Bpro_1627	-44	4.50	ATGaAtTATtGTGCAa
	4	5.42	AaGCAaTATAtTGCAT
Bpro_1628	-97	4.92	ATGCAtaAaAGTGCtT
	-65	4.19	AgGCAtTATtaTtCgT
	-33	4.97	cTGCACTATttTGCtT
Rfer_0218	-109	5.59	ATGCAaTATAGTGCtT
	-60	4.72	cTGCACaATAaTtCAT
Rfer_0219	-45	4.69	ATGaAtTATtGTGCAg
	4	5.53	AaGCACTATAtTGCAT
Rfer_0220	-33	5.13	ATGCACaAaAGTGCtT
	-1	4.82	ATGCACTATgaTGCgT
	31	4.63	ATGCAtTtTtaTGCtT
Rfer_0228	-168	5.17	AgGCACTAaAGTGCAT
	-84	3.90	gTGCAtcAaAaTGCAc
	-52	4.50	AaGCAtgATAcTGCAT
Vapar_0091	-147	5.60	ATGCACTATAtTGCtT
	-96	4.27	AaGCAagATAcTGCAc
Vapar_0092	-120	4.08	gTGCAgTATctTGCtT
	-69	5.52	AaGCAaTATAGTGCAT
Vapar_0093	-82	4.12	ATGCAgcATgaTGCAT
Veis_0730	-140	4.92	gTGCACTATAcTGCtT
Veis_0731	-40	4.86	AaGCAgTATAGTGCAc
Veis_0732	-86	3.79	ATGCAgcATgaTGCAc
	-54	3.98	gcGCAtTATtaTtCAT
azo3054	-292	4.31	tTGaACaATAGTGCAg
	-261	3.53	AaGaggTAaAGTGCAg
	-229	3.67	gcGCACTgcAtTGCAT
	-176	4.22	ATGCggTATAtTGCgT
	-134	5.17	ATGaACTAaAGTGCtT
azo3055	-212	4.98	AaGCACTtTAGTtCAT
	-170	3.98	AcGCAaTATAccGCAT
	-117	3.92	ATGCAaTgcAGTGCgc
	-54	4.36	cTGCACTATtGTtCAa
ebA2759	-294	4.31	tTGaACaATAGTGCAg
	-263	3.91	AaGaggTAaAGTGCAT
	-146	4.49	gaGCAaaATAGTGCAg
	-136	4.38	gTGCAgTAaAGTtCtT
ebA2762	-211	4.22	AaGaACTtTAcTGCAc
	-201	4.64	cTGCACTATttTGCtc
	-53	4.36	cTGCACTATtGTtCAa
ebA5278	-93	4.95	gTGCACTATAaTGCAc
ebA5282	-198	5.15	ATGCACaAaAtTGCAT
	-158	3.99	ATGCACgtgAGTGCAg
	-106	4.01	cTGCACTggAGTGCgT
	-68	3.85	cgGaAaaATAaTGCAg
Tmz1t_3130	-109	4.39	cTGCAtTtTAtTGCAg
	-79	4.21	cTGCACTATttgaCAT
Tmz1t_3136	-257	4.60	gTGCAgTATAtTGCAc
	-141	5.10	ATGCACTtTAGTGCAc
Tmz1t_3137	-249	5.20	gTGCACTAaAGTGCAT
	-133	4.60	gTGCAaTATAcTGCAc

## Sheet: catR catMbenM clcR tfdR(S) mmlR
Binding sites of the (chloro/methyl)catechol and 2,4-D regulators in Betaproteobacteria
CatR(M)/BenM binding sites					ClcR/TfdR(S) binding sites					CatR* binding sites					MmlR binding sites
Bamb_5499	-88	5.54	CATgCCTcAAAGGTATG		Bxe_A1131	-57	5.81	aATACGGgATCGGTATG		Aave_0198	-70	6.68	tTCaTTCGATGCCATCGAACGAT		Reut_A1508	-234	4.76	CATACCtgAcaGGTATG
Bamb_5500	-20	5.55	CATACCTTTgAGGcATG		Bxe_A1130	-129	5.81	CATACCGATcCCGTATt		Aave_0199	-77	6.89	ATCGTTCGATGGCATCGAAtGAa		PHG390	-253	3.81	gATACCcTgtAGaTATc
Bamb_6587	-75	4.84	aATACCcaccAGGTATc		Bpet1533	-57	5.81	aATACGGgATCGGTATG		Ajs_0139	-61	6.31	tTTGTTCGATttCATCGAACagT			-60	4.20	CATACCgCAAAGacAgG
bglu_2g07130	-65	5.04	gATACCTTtAAGATATc		Bpet1534	-129	5.81	CATACCGATcCCGTATt		Ajs_0140	-110	6.51	AcTGTTCGATGaaATCGAACaAa
bglu_2g07140	-75	5.04	gATAtCTTAAAGGTATc		Reut_D6466	-121	5.79	CATACCGAAaCCGTATG		Daci_1870	-117	5.72	AaTcaTCGAcaCCATCGAAtGAT
BMAA0187	-219	4.90	CATACCTcgAgGaTATc		Reut_D6467	-91	5.79	CATACGGtTTCGGTATG		Pnap_2119	-106	6.50	ATCGTTCGAatGtATCGAACGAT
	-124	4.38	tATACCTgcgAaGcATc		Reut_D6474	-72	5.81	CATACCGATcCCGTATc		Pnap_2120	-41	6.59	ATCGTTCGATaCatTCGAACGAT
BMAA0188	-116	4.38	gATgCtTcgcAGGTATa		Reut_D6475	-56	5.81	gATACGGgATCGGTATG		CtesDRAFT_4200	-39	5.65	ATTGTTCGATGGCATCGAtgtAT
	-21	4.90	gATAtCcTcgAGGTATG		Reut_D6478	-54	5.81	gATACGGgATCGGTATG		CtesDRAFT_4002	-134	6.05	ATacaTCGATGCCATCGAACaAT
BMAA0200	-87	5.25	CATACCTcgAAaGTATG		Reut_D6479	-168	5.81	CATACCGATcCCGTATc
BMAA0201	-19	5.28	CATACtTTcgAGGTATG
BPSS1890	-17	5.28	CATACtTTcgAGGTATG
BPSS1891	-89	5.25	CATACCTcgAAaGTATG
BPSS1902	-114	4.38	gATgCtTcgcAGGTATa
	-19	4.90	gATAtCcTcgAGGTATG
BPSS1903	-221	4.90	CATACCTcgAgGaTATc
	-126	4.38	tATACCTgcgAaGcATc
Bphy_4029	-88	5.04	tATgCCccgAAGGTATG
Bphy_4030	-19	5.07	CATACCTTcggGGcATa
Bphy_5352	-153	4.36	gATACCccTtgGaTATt
	-58	4.50	tATACCTTTcgGGTAgc
Bphy_5353	-116	4.41	gcTACCcgAAAGGTATa
	-21	4.49	aATAtCcaAggGGTATc
Bcep18194_B2327	-18	5.55	CATACCTTTgAGGcATG
Bcep18194_B2328	-90	5.54	CATgCCTcAAAGGTATG
Bcep18194_C7044	-103	5.14	aATACCTgTcAGGTATt
Bcep1808_5824	-298	4.64	gATACCTggtgGGTATt
Bcep1808_4159	-88	5.54	CATgCCTcAAAGGTATG
Bcep1808_4160	-20	5.55	CATACCTTTgAGGcATG
Bxe_B0916	-113	5.04	aATgCCTgAAAGGTATa
	-19	5.16	CATAtCcaAAAGGTATG
Bxe_B0915	-177	5.10	CATACCTTTtgGaTATG
	-83	5.07	tATACCTTTcAGGcATt
Bxe_A2108	-102	5.83	CATACCTcTAAGGTATG
Bxe_A2107	-19	5.84	CATACCTTAgAGGTATG
Bpet1401	-48	5.20	tATACCTTcAgGGTATt
Bpet1402	-44	5.21	aATACCcTgAAGGTATa
Bpet3348	-24	5.53	aATACCTTTAAGGTATa
Bpet3349	-97	5.50	tATACCTTAAAGGTATt
Pnap_2112	-389	5.36	CATgCCTTTtAGGTATG
Pnap_2114	-20	5.42	CATACCTaAAAGGcATG
Rpic_1360	-113	4.31	CATgttTTccAGGTATc
	-19	4.98	CATACtccAgAGGTATa
Rpic_1361	-109	4.98	tATACCTcTggaGTATG
	-15	4.20	gATACCTggAAaacATG
Rmet_4878	-109	5.32	CATACCgaAAAGGTATG
Rmet_4879	-80	5.26	CATACCTTTtcGGTATG
Rmet_4880	-19	5.20	gATACCTgTgAGGTATa
	-123	4.06	aATgCtcTgtgGGTATa
Rmet_4881	-171	5.28	tATACCTcAcAGGTATc
	-67	4.11	tATACCcacAgaGcATt
Reut_A1688	-19	5.40	aATACCcTAcAGGTATG
Reut_A1689	-99	5.31	CATACCTgTAgGGTATt
Reut_B4400	-13	5.40	CATACCTaAcgGGTATG
Reut_B4401	-119	4.26	aATgCgTTTggGGTATc
	-25	4.97	tATACCTgctgGGTATG
Reut_B4402	-170	5.07	CATACCcagcAGGTATa
	-76	4.19	gATACCccAAAcGcATt
Reut_B5351	-210	4.54	CATACCTccggcGTATc
Reut_B3938	-151	5.33	gATACCTcTggGGTATG
H16_A1964	-130	4.43	tATACCTcctgaGTATc
	-37	4.60	gATACCTgcAAaGcATG
H16_A1965	-114	4.67	CATgCtTTgcAGGTATc
	-21	4.45	gATACtcaggAGGTATa
H16_A1966	-98	4.90	CATACtcTgtAGGTATG
H16_B0535	-30	5.34	gATACCcTAcAGGTATG
H16_B0536	-75	5.31	CATACCTgTAgGGTATc
PHG405	-100	5.12	aATACCTgTAcGGTATG
PHG406	-82	5.15	CATACCgTAcAGGTATt
PHG382 (nagM6)	-267	3.77	gATgCCcCtAAGGTgaG
